# Supplementary material for: Arabidopsis mRNA polyadenylation machinery: comprehensive analysis of protein-protein interactions and gene expression profiling
Source: PubMed Central journal article supplement (PMC2391170; doi:10.1186/1471-2164-9-220), 2008-05-14
Supplement: 1471-2164-9-220-S3.pdf [file 1471-2164-9-220-S3.pdf]

### Hunt et al. Additional file 3 Compiled results of the two-hybrid assays

| Partner 1 (AtGID) | common name | Partner 2 (AtGID) | common name       | results |
|-------------------|-------------|-------------------|-------------------|---------|
| At5g51660         | CPSF160     | At5g51660         | CPSF160           | n       |
| At5g51660         | CPSF160     | At5g23880         | CPSF100           | y       |
| At5g51660         | CPSF160     | At1g61010         | CPSF73-I          | n       |
| At5g51660         | CPSF160     | At2g01730         | CPSF73-II         | n       |
| At5g51660         | CPSF160     | At1g30460         | CPSF30            | y       |
| At5g51660         | CPSF160     | At1g17760         | CSTF77            | n       |
| At5g51660         | CPSF160     | At1g17760         | CSTF77 C-terminus | n       |
| At5g51660         | CPSF160     | At1g71800         | CSTF64            | n       |
| At5g51660         | CPSF160     | At5g60940         | CSTF50            | n       |
| At5g51660         | CPSF160     | At5g13480         | FY                | n       |
| At5g51660         | CPSF160     | At1g17980         | PAPS1             | n       |
| At5g51660         | CPSF160     | At2g25850         | PAPS2             | n       |
| At5g51660         | CPSF160     | At3g06560         | PAPS3             | n       |
| At5g51660         | CPSF160     | At4g32850         | PAPS4             | n       |
| At5g51660         | CPSF160     | At3g66652         | FIPS3             | n       |
| At5g51660         | CPSF160     | Ag5g58040         | FIPS5 N-terminus  | n       |
| At5g51660         | CPSF160     | At5g58040         | FIPS5 C-terminus  | n       |
| At5g51660         | CPSF160     | At4g29820         | CFIS1             | n       |
| At5g51660         | CPSF160     | At4g25550         | CFIS2             | n       |
| At5g51660         | CPSF160     | At3g04680         | CLPS3             | n       |
| At5g51660         | CPSF160     | At5g39930         | CLPS5             | n       |
| At5g51660         | CPSF160     | At1g66500         | PCFS1             | n       |
| At5g51660         | CPSF160     | At4g04885         | PCFS4             | n       |
| At5g51660         | CPSF160     | At5g43620         | PCFS5             | n       |
| At5g51660         | CPSF160     | At5g51120         | PABN1             | n       |
| At5g51660         | CPSF160     | At5g65260         | PABN2             | n       |
| At5g51660         | CPSF160     | At5g10350         | PABN3             | n       |
| At5g23880         | CPSF100     | At5g23880         | CPSF100           | n       |
| At5g23880         | CPSF100     | At1g61010         | CPSF73-I          | y       |
| At5g23880         | CPSF100     | At2g01730         | CPSF73-II         | y       |
| At5g23880         | CPSF100     | At1g30460         | CPSF30            | y       |
| At5g23880         | CPSF100     | At1g17760         | CSTF77            | n       |
| At5g23880         | CPSF100     | At1g17760         | CSTF77 C-terminus | n       |
| At5g23880         | CPSF100     | At1g71800         | CSTF64            | n       |
| At5g23880         | CPSF100     | At5g60940         | CSTF50            | y       |
| At5g23880         | CPSF100     | At5g13480         | FY                | y       |
| At5g23880         | CPSF100     | At1g17980         | PAPS1             | n       |
| At5g23880         | CPSF100     | At2g25850         | PAPS2             | y       |
| At5g23880         | CPSF100     | At3g06560         | PAPS3             | n       |
| At5g23880         | CPSF100     | At4g32850         | PAPS4             | n       |
| At5g23880         | CPSF100     | At3g66652         | FIPS3             | n       |
| At5g23880         | CPSF100     | Ag5g58040         | FIPS5 N-terminus  | n       |
| At5g23880         | CPSF100     | At5g58040         | FIPS5 C-terminus  | n       |
| At5g23880         | CPSF100     | At4g29820         | CFIS1             | n       |
| At5g23880         | CPSF100     | At4g25550         | CFIS2             | n       |
| At5g23880         | CPSF100     | At3g04680         | CLPS3             | n       |
| At5g23880         | CPSF100     | At5g39930         | CLPS5             | n       |
| At5g23880         | CPSF100     | At1g66500         | PCFS1             | n       |

|           |           |           |                   |   |
|-----------|-----------|-----------|-------------------|---|
| At5g23880 | CPSF100   | At4g04885 | PCFS4             | n |
| At5g23880 | CPSF100   | At5g43620 | PCFS5             | n |
| At5g23880 | CPSF100   | At5g51120 | PABN1             | n |
| At5g23880 | CPSF100   | At5g65260 | PABN2             | n |
| At5g23880 | CPSF100   | At5g10350 | PABN3             | n |
| At1g61010 | CPSF73-I  | At1g61010 | CPSF73-I          | n |
| At1g61010 | CPSF73-I  | At2g01730 | CPSF73-II         | n |
| At1g61010 | CPSF73-I  | At1g30460 | CPSF30            | n |
| At1g61010 | CPSF73-I  | At1g17760 | CSTF77            | n |
| At1g61010 | CPSF73-I  | At1g17760 | CSTF77 C-terminus | n |
| At1g61010 | CPSF73-I  | At1g71800 | CSTF64            | n |
| At1g61010 | CPSF73-I  | At5g60940 | CSTF50            | n |
| At1g61010 | CPSF73-I  | At5g13480 | FY                | n |
| At1g61010 | CPSF73-I  | At1g17980 | PAPS1             | n |
| At1g61010 | CPSF73-I  | At2g25850 | PAPS2             | n |
| At1g61010 | CPSF73-I  | At3g06560 | PAPS3             | n |
| At1g61010 | CPSF73-I  | At4g32850 | PAPS4             | n |
| At1g61010 | CPSF73-I  | At3g66652 | FIPS3             | n |
| At1g61010 | CPSF73-I  | Ag5g58040 | FIPS5 N-terminus  | n |
| At1g61010 | CPSF73-I  | At5g58040 | FIPS5 C-terminus  | n |
| At1g61010 | CPSF73-I  | At4g29820 | CFIS1             | n |
| At1g61010 | CPSF73-I  | At4g25550 | CFIS2             | n |
| At1g61010 | CPSF73-I  | At3g04680 | CLPS3             | n |
| At1g61010 | CPSF73-I  | At5g39930 | CLPS5             | n |
| At1g61010 | CPSF73-I  | At1g66500 | PCFS1             | n |
| At1g61010 | CPSF73-I  | At4g04885 | PCFS4             | n |
| At1g61010 | CPSF73-I  | At5g43620 | PCFS5             | n |
| At1g61010 | CPSF73-I  | At5g51120 | PABN1             | n |
| At1g61010 | CPSF73-I  | At5g65260 | PABN2             | n |
| At1g61010 | CPSF73-I  | At5g10350 | PABN3             | n |
| At2g01730 | CPSF73-II | At2g01730 | CPSF73-II         | n |
| At2g01730 | CPSF73-II | At1g30460 | CPSF30            | n |
| At2g01730 | CPSF73-II | At1g17760 | CSTF77            | n |
| At2g01730 | CPSF73-II | At1g17760 | CSTF77 C-terminus | n |
| At2g01730 | CPSF73-II | At1g71800 | CSTF64            | n |
| At2g01730 | CPSF73-II | At5g60940 | CSTF50            | n |
| At2g01730 | CPSF73-II | At5g13480 | FY                | n |
| At2g01730 | CPSF73-II | At1g17980 | PAPS1             | n |
| At2g01730 | CPSF73-II | At2g25850 | PAPS2             | n |
| At2g01730 | CPSF73-II | At3g06560 | PAPS3             | n |
| At2g01730 | CPSF73-II | At4g32850 | PAPS4             | n |
| At2g01730 | CPSF73-II | At3g66652 | FIPS3             | n |
| At2g01730 | CPSF73-II | Ag5g58040 | FIPS5 N-terminus  | n |
| At2g01730 | CPSF73-II | At5g58040 | FIPS5 C-terminus  | n |
| At2g01730 | CPSF73-II | At4g29820 | CFIS1             | n |
| At2g01730 | CPSF73-II | At4g25550 | CFIS2             | n |
| At2g01730 | CPSF73-II | At3g04680 | CLPS3             | n |
| At2g01730 | CPSF73-II | At5g39930 | CLPS5             | n |
| At2g01730 | CPSF73-II | At1g66500 | PCFS1             | n |
| At2g01730 | CPSF73-II | At4g04885 | PCFS4             | n |
| At2g01730 | CPSF73-II | At5g43620 | PCFS5             | n |
| At2g01730 | CPSF73-II | At5g51120 | PABN1             | n |

|           |                   |           |                   |    |
|-----------|-------------------|-----------|-------------------|----|
| At2g01730 | CPSF73-II         | At5g65260 | PABN2             | n  |
| At2g01730 | CPSF73-II         | At5g10350 | PABN3             | n  |
| At1g30460 | CPSF30            | At1g30460 | CPSF30            | y  |
| At1g30460 | CPSF30            | At1g17760 | CSTF77            | y  |
| At1g30460 | CPSF30            | At1g17760 | CSTF77 C-terminus | y  |
| At1g30460 | CPSF30            | At1g71800 | CSTF64            | n  |
| At1g30460 | CPSF30            | At5g60940 | CSTF50            | y  |
| At1g30460 | CPSF30            | At5g13480 | FY                | n  |
| At1g30460 | CPSF30            | At1g17980 | PAPS1             | n  |
| At1g30460 | CPSF30            | At2g25850 | PAPS2             | y  |
| At1g30460 | CPSF30            | At3g06560 | PAPS3             | y  |
| At1g30460 | CPSF30            | At4g32850 | PAPS4             | a  |
| At1g30460 | CPSF30            | At3g66652 | FIPS3             | y  |
| At1g30460 | CPSF30            | Ag5g58040 | FIPS5 N-terminus  | y  |
| At1g30460 | CPSF30            | At5g58040 | FIPS5 C-terminus  | n  |
| At1g30460 | CPSF30            | At4g29820 | CFIS1             | n  |
| At1g30460 | CPSF30            | At4g25550 | CFIS2             | y  |
| At1g30460 | CPSF30            | At3g04680 | CLPS3             | y  |
| At1g30460 | CPSF30            | At5g39930 | CLPS5             | n  |
| At1g30460 | CPSF30            | At1g66500 | PCFS1             | y  |
| At1g30460 | CPSF30            | At4g04885 | PCFS4             | y  |
| At1g30460 | CPSF30            | At5g43620 | PCFS5             | n  |
| At1g30460 | CPSF30            | At5g51120 | PABN1             | n  |
| At1g30460 | CPSF30            | At5g65260 | PABN2             | n  |
| At1g30460 | CPSF30            | At5g10350 | PABN3             | n  |
| At1g17760 | CSTF77            | At1g17760 | CSTF77            | n  |
| At1g17760 | CSTF77            | At1g17760 | CSTF77 C-terminus | nt |
| At1g17760 | CSTF77            | At1g71800 | CSTF64            | y  |
| At1g17760 | CSTF77            | At5g60940 | CSTF50            | n  |
| At1g17760 | CSTF77            | At5g13480 | FY                | n  |
| At1g17760 | CSTF77            | At1g17980 | PAPS1             | n  |
| At1g17760 | CSTF77            | At2g25850 | PAPS2             | n  |
| At1g17760 | CSTF77            | At3g06560 | PAPS3             | n  |
| At1g17760 | CSTF77            | At4g32850 | PAPS4             | n  |
| At1g17760 | CSTF77            | At3g66652 | FIPS3             | n  |
| At1g17760 | CSTF77            | Ag5g58040 | FIPS5 N-terminus  | y  |
| At1g17760 | CSTF77            | At5g58040 | FIPS5 C-terminus  | n  |
| At1g17760 | CSTF77            | At4g29820 | CFIS1             | n  |
| At1g17760 | CSTF77            | At4g25550 | CFIS2             | n  |
| At1g17760 | CSTF77            | At3g04680 | CLPS3             | n  |
| At1g17760 | CSTF77            | At5g39930 | CLPS5             | n  |
| At1g17760 | CSTF77            | At1g66500 | PCFS1             | y  |
| At1g17760 | CSTF77            | At4g04885 | PCFS4             | n  |
| At1g17760 | CSTF77            | At5g43620 | PCFS5             | y  |
| At1g17760 | CSTF77            | At5g51120 | PABN1             | n  |
| At1g17760 | CSTF77            | At5g65260 | PABN2             | n  |
| At1g17760 | CSTF77            | At5g10350 | PABN3             | n  |
| At1g17760 | CSTF77 C-terminus | At1g17760 | CSTF77 C-terminus | nt |
| At1g17760 | CSTF77 C-terminus | At1g71800 | CSTF64            | y  |
| At1g17760 | CSTF77 C-terminus | At5g60940 | CSTF50            | n  |
| At1g17760 | CSTF77 C-terminus | At5g13480 | FY                | n  |
| At1g17760 | CSTF77 C-terminus | At1g17980 | PAPS1             | n  |

|           |                   |           |                  |   |
|-----------|-------------------|-----------|------------------|---|
| At1g17760 | CSTF77 C-terminus | At2g25850 | PAPS2            | n |
| At1g17760 | CSTF77 C-terminus | At3g06560 | PAPS3            | n |
| At1g17760 | CSTF77 C-terminus | At4g32850 | PAPS4            | n |
| At1g17760 | CSTF77 C-terminus | At3g66652 | FIPS3            | n |
| At1g17760 | CSTF77 C-terminus | Ag5g58040 | FIPS5 N-terminus | y |
| At1g17760 | CSTF77 C-terminus | At5g58040 | FIPS5 C-terminus | n |
| At1g17760 | CSTF77 C-terminus | At4g29820 | CFIS1            | n |
| At1g17760 | CSTF77 C-terminus | At4g25550 | CFIS2            | n |
| At1g17760 | CSTF77 C-terminus | At3g04680 | CLPS3            | n |
| At1g17760 | CSTF77 C-terminus | At5g39930 | CLPS5            | n |
| At1g17760 | CSTF77 C-terminus | At1g66500 | PCFS1            | n |
| At1g17760 | CSTF77 C-terminus | At4g04885 | PCFS4            | n |
| At1g17760 | CSTF77 C-terminus | At5g43620 | PCFS5            | y |
| At1g17760 | CSTF77 C-terminus | At5g51120 | PABN1            | n |
| At1g17760 | CSTF77 C-terminus | At5g65260 | PABN2            | n |
| At1g17760 | CSTF77 C-terminus | At5g10350 | PABN3            | n |
| At1g71800 | CSTF64            | At1g71800 | CSTF64           | n |
| At1g71800 | CSTF64            | At5g60940 | CSTF50           | y |
| At1g71800 | CSTF64            | At5g13480 | FY               | n |
| At1g71800 | CSTF64            | At1g17980 | PAPS1            | n |
| At1g71800 | CSTF64            | At2g25850 | PAPS2            | n |
| At1g71800 | CSTF64            | At3g06560 | PAPS3            | n |
| At1g71800 | CSTF64            | At4g32850 | PAPS4            | n |
| At1g71800 | CSTF64            | At3g66652 | FIPS3            | y |
| At1g71800 | CSTF64            | Ag5g58040 | FIPS5 N-terminus | n |
| At1g71800 | CSTF64            | At5g58040 | FIPS5 C-terminus | y |
| At1g71800 | CSTF64            | At4g29820 | CFIS1            | n |
| At1g71800 | CSTF64            | At4g25550 | CFIS2            | n |
| At1g71800 | CSTF64            | At3g04680 | CLPS3            | n |
| At1g71800 | CSTF64            | At5g39930 | CLPS5            | n |
| At1g71800 | CSTF64            | At1g66500 | PCFS1            | n |
| At1g71800 | CSTF64            | At4g04885 | PCFS4            | n |
| At1g71800 | CSTF64            | At5g43620 | PCFS5            | n |
| At1g71800 | CSTF64            | At5g51120 | PABN1            | n |
| At1g71800 | CSTF64            | At5g65260 | PABN2            | n |
| At1g71800 | CSTF64            | At5g10350 | PABN3            | n |
| At5g60940 | CSTF50            | At5g60940 | CSTF50           | n |
| At5g60940 | CSTF50            | At5g13480 | FY               | n |
| At5g60940 | CSTF50            | At1g17980 | PAPS1            | n |
| At5g60940 | CSTF50            | At2g25850 | PAPS2            | n |
| At5g60940 | CSTF50            | At3g06560 | PAPS3            | n |
| At5g60940 | CSTF50            | At4g32850 | PAPS4            | n |
| At5g60940 | CSTF50            | At3g66652 | FIPS3            | n |
| At5g60940 | CSTF50            | Ag5g58040 | FIPS5 N-terminus | y |
| At5g60940 | CSTF50            | At5g58040 | FIPS5 C-terminus | n |
| At5g60940 | CSTF50            | At4g29820 | CFIS1            | n |
| At5g60940 | CSTF50            | At4g25550 | CFIS2            | n |
| At5g60940 | CSTF50            | At3g04680 | CLPS3            | n |
| At5g60940 | CSTF50            | At5g39930 | CLPS5            | n |
| At5g60940 | CSTF50            | At1g66500 | PCFS1            | n |
| At5g60940 | CSTF50            | At4g04885 | PCFS4            | n |
| At5g60940 | CSTF50            | At5g43620 | PCFS5            | n |

|           |        |           |                  |   |
|-----------|--------|-----------|------------------|---|
| At5g60940 | CSTF50 | At5g51120 | PABN1            | n |
| At5g60940 | CSTF50 | At5g65260 | PABN2            | n |
| At5g60940 | CSTF50 | At5g10350 | PABN3            | y |
| At5g13480 | FY     | At5g13480 | FY               | n |
| At5g13480 | FY     | At1g17980 | PAPS1            | n |
| At5g13480 | FY     | At2g25850 | PAPS2            | n |
| At5g13480 | FY     | At3g06560 | PAPS3            | n |
| At5g13480 | FY     | At4g32850 | PAPS4            | n |
| At5g13480 | FY     | At3g66652 | FIPS3            | n |
| At5g13480 | FY     | Ag5g58040 | FIPS5 N-terminus | n |
| At5g13480 | FY     | At5g58040 | FIPS5 C-terminus | n |
| At5g13480 | FY     | At4g29820 | CFIS1            | n |
| At5g13480 | FY     | At4g25550 | CFIS2            | n |
| At5g13480 | FY     | At3g04680 | CLPS3            | n |
| At5g13480 | FY     | At5g39930 | CLPS5            | n |
| At5g13480 | FY     | At1g66500 | PCFS1            | n |
| At5g13480 | FY     | At4g04885 | PCFS4            | n |
| At5g13480 | FY     | At5g43620 | PCFS5            | n |
| At5g13480 | FY     | At5g51120 | PABN1            | n |
| At5g13480 | FY     | At5g65260 | PABN2            | n |
| At5g13480 | FY     | At5g10350 | PABN3            | n |
| At1g17980 | PAPS1  | At1g17980 | PAPS1            | n |
| At1g17980 | PAPS1  | At2g25850 | PAPS2            | n |
| At1g17980 | PAPS1  | At3g06560 | PAPS3            | n |
| At1g17980 | PAPS1  | At4g32850 | PAPS4            | y |
| At1g17980 | PAPS1  | At3g66652 | FIPS3            | n |
| At1g17980 | PAPS1  | Ag5g58040 | FIPS5 N-terminus | n |
| At1g17980 | PAPS1  | At5g58040 | FIPS5 C-terminus | n |
| At1g17980 | PAPS1  | At4g29820 | CFIS1            | n |
| At1g17980 | PAPS1  | At4g25550 | CFIS2            | n |
| At1g17980 | PAPS1  | At3g04680 | CLPS3            | n |
| At1g17980 | PAPS1  | At5g39930 | CLPS5            | n |
| At1g17980 | PAPS1  | At1g66500 | PCFS1            | n |
| At1g17980 | PAPS1  | At4g04885 | PCFS4            | n |
| At1g17980 | PAPS1  | At5g43620 | PCFS5            | n |
| At1g17980 | PAPS1  | At5g51120 | PABN1            | n |
| At1g17980 | PAPS1  | At5g65260 | PABN2            | n |
| At1g17980 | PAPS1  | At5g10350 | PABN3            | n |
| At2g25850 | PAPS2  | At2g25850 | PAPS2            | n |
| At2g25850 | PAPS2  | At3g06560 | PAPS3            | n |
| At2g25850 | PAPS2  | At4g32850 | PAPS4            | n |
| At2g25850 | PAPS2  | At3g66652 | FIPS3            | n |
| At2g25850 | PAPS2  | Ag5g58040 | FIPS5 N-terminus | y |
| At2g25850 | PAPS2  | At5g58040 | FIPS5 C-terminus | n |
| At2g25850 | PAPS2  | At4g29820 | CFIS1            | n |
| At2g25850 | PAPS2  | At4g25550 | CFIS2            | n |
| At2g25850 | PAPS2  | At3g04680 | CLPS3            | n |
| At2g25850 | PAPS2  | At5g39930 | CLPS5            | n |
| At2g25850 | PAPS2  | At1g66500 | PCFS1            | n |
| At2g25850 | PAPS2  | At4g04885 | PCFS4            | n |
| At2g25850 | PAPS2  | At5g43620 | PCFS5            | n |
| At2g25850 | PAPS2  | At5g51120 | PABN1            | n |

|           |                  |           |                  |   |
|-----------|------------------|-----------|------------------|---|
| At2g25850 | PAPS2            | At5g65260 | PABN2            | y |
| At2g25850 | PAPS2            | At5g10350 | PABN3            | n |
| At3g06560 | PAPS3            | At3g06560 | PAPS3            | n |
| At3g06560 | PAPS3            | At4g32850 | PAPS4            | n |
| At3g06560 | PAPS3            | At3g66652 | FIPS3            | n |
| At3g06560 | PAPS3            | Ag5g58040 | FIPS5 N-terminus | y |
| At3g06560 | PAPS3            | At5g58040 | FIPS5 C-terminus | n |
| At3g06560 | PAPS3            | At4g29820 | CFIS1            | n |
| At3g06560 | PAPS3            | At4g25550 | CFIS2            | n |
| At3g06560 | PAPS3            | At3g04680 | CLPS3            | n |
| At3g06560 | PAPS3            | At5g39930 | CLPS5            | n |
| At3g06560 | PAPS3            | At1g66500 | PCFS1            | n |
| At3g06560 | PAPS3            | At4g04885 | PCFS4            | n |
| At3g06560 | PAPS3            | At5g43620 | PCFS5            | n |
| At3g06560 | PAPS3            | At5g51120 | PABN1            | n |
| At3g06560 | PAPS3            | At5g65260 | PABN2            | n |
| At3g06560 | PAPS3            | At5g10350 | PABN3            | n |
| At4g32850 | PAPS4            | At4g32850 | PAPS4            | n |
| At4g32850 | PAPS4            | At3g66652 | FIPS3            | y |
| At4g32850 | PAPS4            | Ag5g58040 | FIPS5 N-terminus | y |
| At4g32850 | PAPS4            | At5g58040 | FIPS5 C-terminus | n |
| At4g32850 | PAPS4            | At4g29820 | CFIS1            | n |
| At4g32850 | PAPS4            | At4g25550 | CFIS2            | y |
| At4g32850 | PAPS4            | At3g04680 | CLPS3            | n |
| At4g32850 | PAPS4            | At5g39930 | CLPS5            | n |
| At4g32850 | PAPS4            | At1g66500 | PCFS1            | n |
| At4g32850 | PAPS4            | At4g04885 | PCFS4            | n |
| At4g32850 | PAPS4            | At5g43620 | PCFS5            | n |
| At4g32850 | PAPS4            | At5g51120 | PABN1            | y |
| At4g32850 | PAPS4            | At5g65260 | PABN2            | y |
| At4g32850 | PAPS4            | At5g10350 | PABN3            | y |
| At3g66652 | FIPS3            | At3g66652 | FIPS3            | n |
| At3g66652 | FIPS3            | Ag5g58040 | FIPS5 N-terminus | y |
| At3g66652 | FIPS3            | At5g58040 | FIPS5 C-terminus | n |
| At3g66652 | FIPS3            | At4g29820 | CFIS1            | n |
| At3g66652 | FIPS3            | At4g25550 | CFIS2            | n |
| At3g66652 | FIPS3            | At3g04680 | CLPS3            | n |
| At3g66652 | FIPS3            | At5g39930 | CLPS5            | y |
| At3g66652 | FIPS3            | At1g66500 | PCFS1            | y |
| At3g66652 | FIPS3            | At4g04885 | PCFS4            | n |
| At3g66652 | FIPS3            | At5g43620 | PCFS5            | n |
| At3g66652 | FIPS3            | At5g51120 | PABN1            | n |
| At3g66652 | FIPS3            | At5g65260 | PABN2            | n |
| At3g66652 | FIPS3            | At5g10350 | PABN3            | n |
| Ag5g58040 | FIPS5 N-terminus | Ag5g58040 | FIPS5 N-terminus | n |
| Ag5g58040 | FIPS5 N-terminus | At5g58040 | FIPS5 C-terminus | n |
| Ag5g58040 | FIPS5 N-terminus | At4g29820 | CFIS1            | y |
| Ag5g58040 | FIPS5 N-terminus | At4g25550 | CFIS2            | y |
| Ag5g58040 | FIPS5 N-terminus | At3g04680 | CLPS3            | n |
| Ag5g58040 | FIPS5 N-terminus | At5g39930 | CLPS5            | n |
| Ag5g58040 | FIPS5 N-terminus | At1g66500 | PCFS1            | n |
| Ag5g58040 | FIPS5 N-terminus | At4g04885 | PCFS4            | n |

|           |                  |           |                  |   |
|-----------|------------------|-----------|------------------|---|
| Ag5g58040 | FIPS5 N-terminus | At5g43620 | PCFS5            | n |
| Ag5g58040 | FIPS5 N-terminus | At5g51120 | PABN1            | y |
| Ag5g58040 | FIPS5 N-terminus | At5g65260 | PABN2            | y |
| Ag5g58040 | FIPS5 N-terminus | At5g10350 | PABN3            | y |
| At5g58040 | FIPS5 C-terminus | At5g58040 | FIPS5 C-terminus | n |
| At5g58040 | FIPS5 C-terminus | At4g29820 | CFIS1            | n |
| At5g58040 | FIPS5 C-terminus | At4g25550 | CFIS2            | n |
| At5g58040 | FIPS5 C-terminus | At3g04680 | CLPS3            | n |
| At5g58040 | FIPS5 C-terminus | At5g39930 | CLPS5            | n |
| At5g58040 | FIPS5 C-terminus | At1g66500 | PCFS1            | n |
| At5g58040 | FIPS5 C-terminus | At4g04885 | PCFS4            | n |
| At5g58040 | FIPS5 C-terminus | At5g43620 | PCFS5            | n |
| At5g58040 | FIPS5 C-terminus | At5g51120 | PABN1            | n |
| At5g58040 | FIPS5 C-terminus | At5g65260 | PABN2            | n |
| At5g58040 | FIPS5 C-terminus | At5g10350 | PABN3            | n |
| At4g29820 | CFIS1            | At4g29820 | CFIS1            | n |
| At4g29820 | CFIS1            | At4g25550 | CFIS2            | n |
| At4g29820 | CFIS1            | At3g04680 | CLPS3            | n |
| At4g29820 | CFIS1            | At5g39930 | CLPS5            | n |
| At4g29820 | CFIS1            | At1g66500 | PCFS1            | n |
| At4g29820 | CFIS1            | At4g04885 | PCFS4            | n |
| At4g29820 | CFIS1            | At5g43620 | PCFS5            | n |
| At4g29820 | CFIS1            | At5g51120 | PABN1            | n |
| At4g29820 | CFIS1            | At5g65260 | PABN2            | n |
| At4g29820 | CFIS1            | At5g10350 | PABN3            | n |
| At4g25550 | CFIS2            | At4g25550 | CFIS2            | n |
| At4g25550 | CFIS2            | At3g04680 | CLPS3            | n |
| At4g25550 | CFIS2            | At5g39930 | CLPS5            | n |
| At4g25550 | CFIS2            | At1g66500 | PCFS1            | n |
| At4g25550 | CFIS2            | At4g04885 | PCFS4            | n |
| At4g25550 | CFIS2            | At5g43620 | PCFS5            | n |
| At4g25550 | CFIS2            | At5g51120 | PABN1            | n |
| At4g25550 | CFIS2            | At5g65260 | PABN2            | n |
| At4g25550 | CFIS2            | At5g10350 | PABN3            | n |
| At3g04680 | CLPS3            | At3g04680 | CLPS3            | n |
| At3g04680 | CLPS3            | At5g39930 | CLPS5            | n |
| At3g04680 | CLPS3            | At1g66500 | PCFS1            | y |
| At3g04680 | CLPS3            | At4g04885 | PCFS4            | y |
| At3g04680 | CLPS3            | At5g43620 | PCFS5            | y |
| At3g04680 | CLPS3            | At5g51120 | PABN1            | n |
| At3g04680 | CLPS3            | At5g65260 | PABN2            | n |
| At3g04680 | CLPS3            | At5g10350 | PABN3            | n |
| At5g39930 | CLPS5            | At5g39930 | CLPS5            | n |
| At5g39930 | CLPS5            | At1g66500 | PCFS1            | n |
| At5g39930 | CLPS5            | At4g04885 | PCFS4            | n |
| At5g39930 | CLPS5            | At5g43620 | PCFS5            | n |
| At5g39930 | CLPS5            | At5g51120 | PABN1            | n |
| At5g39930 | CLPS5            | At5g65260 | PABN2            | n |
| At5g39930 | CLPS5            | At5g10350 | PABN3            | n |
| At1g66500 | PCFS1            | At1g66500 | PCFS1            | n |
| At1g66500 | PCFS1            | At4g04885 | PCFS4            | y |
| At1g66500 | PCFS1            | At5g43620 | PCFS5            | y |

|           |       |           |       |   |
|-----------|-------|-----------|-------|---|
| At1g66500 | PCFS1 | At5g51120 | PABN1 | n |
| At1g66500 | PCFS1 | At5g65260 | PABN2 | n |
| At1g66500 | PCFS1 | At5g10350 | PABN3 | n |
| At4g04885 | PCFS4 | At4g04885 | PCFS4 | y |
| At4g04885 | PCFS4 | At5g43620 | PCFS5 | y |
| At4g04885 | PCFS4 | At5g51120 | PABN1 | n |
| At4g04885 | PCFS4 | At5g65260 | PABN2 | n |
| At4g04885 | PCFS4 | At5g10350 | PABN3 | n |
| At5g43620 | PCFS5 | At5g43620 | PCFS5 | n |
| At5g43620 | PCFS5 | At5g51120 | PABN1 | n |
| At5g43620 | PCFS5 | At5g65260 | PABN2 | n |
| At5g43620 | PCFS5 | At5g10350 | PABN3 | n |
| At5g51120 | PABN1 | At5g51120 | PABN1 | y |
| At5g51120 | PABN1 | At5g65260 | PABN2 | y |
| At5g51120 | PABN1 | At5g10350 | PABN3 | y |
| At5g65260 | PABN2 | At5g65260 | PABN2 | y |
| At5g65260 | PABN2 | At5g10350 | PABN3 | y |
| At5g10350 | PABN3 | At5g10350 | PABN3 | y |
